# Supplementary material
Source: MDPI journal article supplement (https://www.mdpi.com/1999-4907/13/12/2039)
Supplement: s1 [file s1]

**Table S1.** Water conservation of land use in Hulunbuir forest-steppe ecotone from 2000 to 2020.

| LULC types       | 2000                           |       | 2005                           |       | 2010                           |       | 2015                           |       | 2020                           |       |
|------------------|--------------------------------|-------|--------------------------------|-------|--------------------------------|-------|--------------------------------|-------|--------------------------------|-------|
|                  | 10 <sup>8</sup> m <sup>3</sup> | %     |
| Farmland         | 3.0021                         | 7.3%  | 1.7794                         | 8.4%  | 2.1463                         | 12.5% | 4.2935                         | 9.3%  | 3.0056                         | 9.4%  |
| Woodland         | 16.7212                        | 40.4% | 7.7117                         | 36.5% | 7.6547                         | 44.7% | 25.5333                        | 55.2% | 17.0349                        | 53.1% |
| Grassland        | 21.5904                        | 52.2% | 11.6028                        | 54.9% | 7.2544                         | 42.4% | 16.2204                        | 35.1% | 11.9453                        | 37.2% |
| Unused land      | 0.0180                         | 0.0%  | 0.0099                         | 0.0%  | 0.0272                         | 0.2%  | 0.0753                         | 0.2%  | 0.0493                         | 0.2%  |
| Residential area | 0.0630                         | 0.2%  | 0.0294                         | 0.1%  | 0.0329                         | 0.2%  | 0.0925                         | 0.2%  | 0.0713                         | 0.2%  |
| Water            | 0.0018                         | 0.0%  | 0.0009                         | 0.0%  | 0.0009                         | 0.0%  | 0.0023                         | 0.0%  | 0.0010                         | 0.0%  |

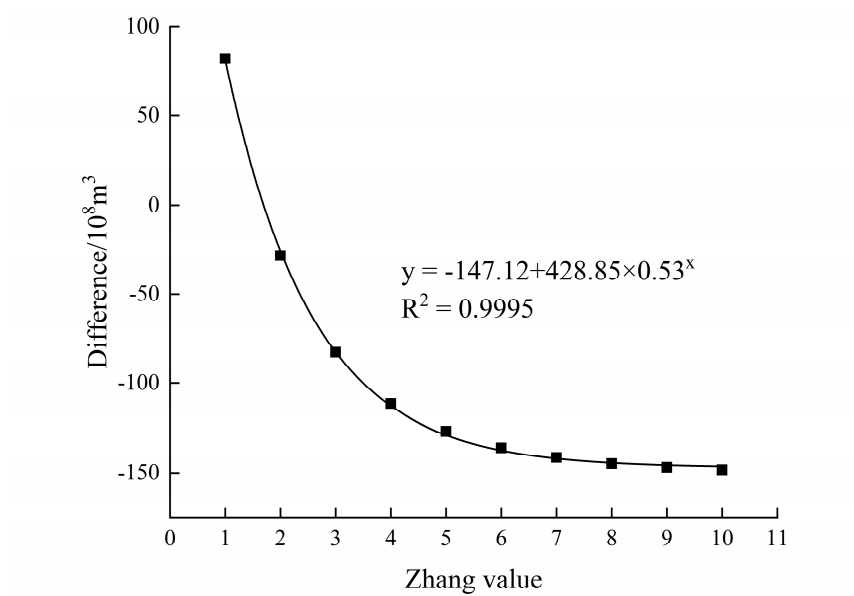

**Figure S1.** The difference between the simulated and measured water resources.

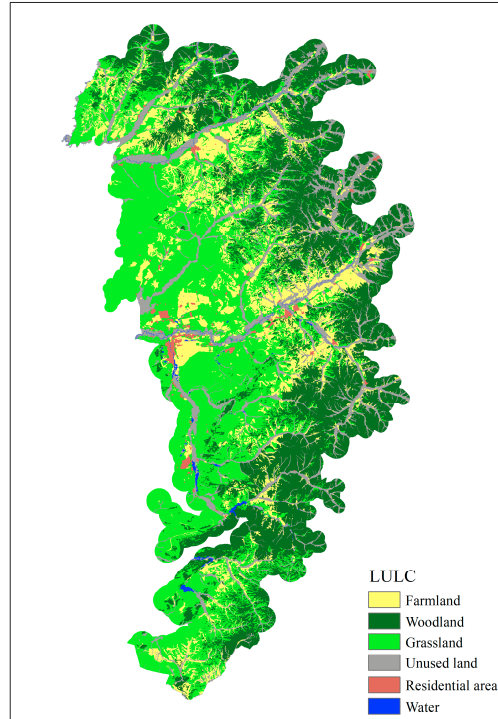

**Figure S2.** Spatial distribution of land use in forest-steppe ecotone in 2020.
